# Supplementary material
Source: PubMed Central journal article supplement (PMC6193528)
Supplement: NIHMS79915-supplement-Supplementary_Information.pdf [file NIHMS79915-supplement-Supplementary_Information.pdf]

## Supplementary Information for:

### Automated design of efficient and functionally diverse enzyme repertoires

Khersonsky et al.

#### Supplemental Tables

Tables S1 and S5 are supplied as individual Excel sheets.

**Table S2. Activity of PTE variants with nerve agents of V type,  $k_{\text{cat}}/K_{\text{M}}$  s<sup>-1</sup>M<sup>-1</sup>.**

**Related to Figure 2.**

| Variant | VX          |          | RVX         |             |
|---------|-------------|----------|-------------|-------------|
|         | S-isomer    | R-isomer | S-isomer    | R-isomer    |
| PTE S5  | 157±12      | 113±3    | 10.0±1.6    | 333±22      |
| dPTE2   | 317±67      | 400±12   | 217±67      | 1833±167    |
| PTE_3   | 141.7       | 40       | 1650        | <16         |
| PTE_4   | 250.0       | 110      | 1567        | <16         |
| PTE_7   | <16         | 30       | 18          | <16         |
| PTE_9   | 35          | 183      | 23          | <16         |
| PTE_10  | 60          | 72       | 18          | <16         |
| PTE_13  | 152±1       | 62       | 50          | 500         |
| PTE_24  | 116±10      | 650±47   | 100         | NM          |
| PTE_26  | <16         | 18       | <16         | <16         |
| PTE_27  | 11,000±2333 | 4000±167 | 333±166     | 11,500±1000 |
| PTE_28  | 700±50      | <25      | 15,500±1167 | <25         |

|           |         |         |            |     |
|-----------|---------|---------|------------|-----|
| PTE_29    | 666±166 | 333±166 | 5500±500   | 210 |
| PTE_30    | 33      |         | 27         | 122 |
| PTE_32    | <16     | 133     | <16        | <16 |
| PTE_33    | <16     |         | <16        | <16 |
| PTE_34    | <16     |         | <16        | <16 |
| PTE_27.4  | 35      |         | 283        | <33 |
| PTE_27.5  | 750     |         | 1133       | <33 |
| PTE_27.7  | 917     |         | 7500       | 833 |
| PTE_27.10 | 4833    |         | 467        | <33 |
| PTE_27.13 | 483     |         | 8167       | <33 |
| PTE_27.14 | 717±100 | <25     | 14670±1500 | <25 |
| PTE_27.16 | 250±50  | <25     | 2667±117   | <33 |
| PTE_27.18 | 138     |         | 3000       | <33 |
| PTE_27.19 | 20      |         | 300        | <33 |
| PTE_27.22 | 45      |         | 67         | <33 |
| PTE_27.24 | 80      |         | 2667       | <33 |
| PTE_27.25 | 90      |         | 8167       | <33 |
| PTE_27.27 | 40      |         | 900        | <33 |

**Table S3. Comparison of best PTE designs activity with nerve agents with that of PTE variants obtained by directed evolution.  $k_{cat}/K_M \times 10^6 \text{ M}^{-1}\text{min}^{-1}$ , measured in 50 mM Tris with 50 mM NaCl at pH 8, 25°C. Related to Figure 2.**

| Variant                                  | GF                                                   | GD                                                                  | S-VX                                     | S-RVX                                      |
|------------------------------------------|------------------------------------------------------|---------------------------------------------------------------------|------------------------------------------|--------------------------------------------|
| PTE-S5 <sup>a</sup>                      | 0.048±0.008 <sup>a</sup><br>0.124±0.009 <sup>c</sup> | 0.98±0.31<br>(0.11±0.03) <sup>a,b</sup><br>0.099±0.005 <sup>c</sup> | 0.0094 <sup>a</sup><br>0.01 <sup>c</sup> | 0.0006 <sup>a</sup><br>0.0009 <sup>c</sup> |
| dPTE2                                    | 0.170±0.003                                          | 0.29±0.06<br>(0.10±0.01)                                            | 0.019±0.004                              | 0.013±0.004                                |
| PTE_27                                   | 1.06±0.11                                            | 0.11±0.017                                                          | 0.66 ±0.14                               | 0.02±0.01                                  |
| PTE_28                                   | 191±36                                               | 3.9±0.2                                                             | 0.042±0.003                              | 0.93±0.07                                  |
| PTE_27.14                                | 159±19                                               | 31.2 ±14.0<br>(6.2±1.2)                                             | 0.043 ±0.006                             | 0.88±0.09                                  |
| PTE_27.16                                | 136±18                                               | 119.5±4.9<br>(20.5±13.4)                                            | 0.015±0.003                              | 0.16±0.7                                   |
| C23 <sup>c</sup>                         | 1.74±0.23                                            | 2.64±0.16                                                           | 5.95±0.16                                | 0.45±0.01                                  |
| IV-A1 <sup>c</sup>                       | 1.86±0.18                                            | 1.53±0.05                                                           | 2.53±0.11                                | 5.27±0.16                                  |
| d1-IVA1 <sup>d</sup><br>PROSS stabilized |                                                      | 3.8<br>(1.1) <sup>b</sup>                                           | 3.5                                      | 12                                         |
| 10-2-C3 <sup>d</sup><br>stabilized       |                                                      | 1.4<br>(0.2) <sup>b</sup>                                           | 50                                       | 3.2                                        |

<sup>a</sup> Data for wt-PTE-S5 taken from Cherny et al (Cherny et al., 2013). Determined at 25°C, by use of both the DTNB and the loss of anti-AChE protocols.

<sup>b</sup> In some cases, detoxification of the two S-enantiomers of GD was biphasic, which is attributed to the two toxic isomers, S<sub>p</sub>C<sub>R</sub> and S<sub>p</sub>C<sub>S</sub>. The parameters for the slow phase are given in the parentheses.

<sup>c</sup> Data from Goldsmith et al (Goldsmith et al., 2016). All entries determined with authentic nerve agents at 37°C using the protocol of monitoring the ani-AChE loss of the OPs.

<sup>d</sup> Data from Goldsmith et al (Goldsmith et al., 2017).

**Table S4. Data collection and refinement statistics for the PTE designs. Related to Figure 4.**

|                                             | PTE_5                     | PTE_27                   | PTE_28                    |
|---------------------------------------------|---------------------------|--------------------------|---------------------------|
| <b>Data Collection</b>                      |                           |                          |                           |
| PDB code                                    | 6GBJ                      | 6GBK                     | 6GBL                      |
| Space group                                 | $P4_32_12$                | $C2$                     | $C2$                      |
| Cell dimensions:                            |                           |                          |                           |
| a,b,c (Å)                                   | 69.49 69.49 186.02        | 156.75 53.09 89.23       | 55.80 53.56 89.34         |
| $\alpha,\beta,\gamma$ (°)                   | 90, 90, 90                | 90, 106.81, 90           | 90, 107.21, 90            |
| No. of copies in a.u.                       | 1                         | 1                        | 1                         |
| Resolution (Å)                              | 38.65 -1.63               | 41.47-1.9                | 41.61-1.95                |
| Upper resolution shell (Å)                  | 1.69 -1.63                | 1.97 -1.9                | 2.02-1.95                 |
| Unique reflections                          | 57,720 (5,611)            | 55,705 (5,523)           | 45,387 (3,967)            |
| Completeness (%)<br>Multiplicity            | 99.70 (98.79)<br>7.4(7.3) | 99.91(99.87)<br>3.3(3.2) | 87.83 (77.54)<br>7.4(7.3) |
| Average I/ $\sigma$ (I)                     | 13.5(2.8)                 | 5.56 (1.49)              | 10.91(3.05)               |
| Rsym (I) (%)                                | 0.0338(0.262)             | 0.09026 (0.4785)         | 0.0456(0.224)             |
| <b>Refinement</b>                           |                           |                          |                           |
| Resolution range (Å)                        | 38.65 -1.63               | 41.47-1.9                | 41.61-1.95                |
| No. of reflections<br>(I/ $\sigma$ (I) > 0) | 57,716                    | 55,668                   | 45,382                    |
| No. of reflections in<br>test set           | 2,886                     | 2,783                    | 2,272                     |

|                                                |               |               |               |
|------------------------------------------------|---------------|---------------|---------------|
| R-working (%) /<br>R-free (%)                  | 0.1696/0.1891 | 0.2010/0.2182 | 0.1833/0.2253 |
| No. of protein atoms                           | 2,558         | 5,064         | 5063          |
| No. of water<br>molecules                      | 330           | 659           | 660           |
| Overall average B<br>factor ( $\text{\AA}^2$ ) | 18.54         | 11.32         | 18.61         |
| Root mean square<br>deviations:                |               |               |               |
| - bond length ( $\text{\AA}$ )                 | 0.025         | 0.011         | 0.018         |
| - bond angle ( $^\circ$ )                      | 2.36          | 1.53          | 1.85          |
| <b>Ramachandran Plot</b>                       |               |               |               |
| Most favored (%)                               | 96.95         | 96.47         | 96.31         |
| Additionally allowed<br>(%)                    | 3.05          | 3.53          | 3.69          |
| Disallowed (%)                                 | 0.0           | 0.0           | 0.0           |

\* Values in parentheses refer to the data of the corresponding upper resolution shell

**Table S6. Specificity changes (as ratios of specific activity) in ACS variants.**

**Related to Figure 5.**

| ACS variant | Acetate/<br>Butyrate | Specificity<br>switch<br>relative to<br>ACS_PROSS | Acetate/<br>Isobutyrate | Specificity<br>switch<br>relative to<br>ACS_PROSS | Acetate/<br>Caproate | Specificity<br>switch<br>relative to<br>ACS_PROSS |
|-------------|----------------------|---------------------------------------------------|-------------------------|---------------------------------------------------|----------------------|---------------------------------------------------|
| ACS_PROSS   | 22.5                 | 1.0                                               | 44.4                    | 1.0                                               | 29.8                 | 1.0                                               |
| ACS_3       | 27.2                 | 0.8                                               | 50.6                    | 0.9                                               | 75.9                 | 0.4                                               |
| ACS_4       | 13.8                 | 1.6                                               | 2.4                     | 18.8                                              | 25.3                 | 1.2                                               |
| ACS_9       | 5.5                  | 4.1                                               | 0.9                     | 46.9                                              | 33.5                 | 0.9                                               |
| ACS_10      | 11.1                 | 2.0                                               | 3.0                     | 14.8                                              | 13.8                 | 2.2                                               |
| ACS_14      | 0.3                  | 87.9                                              | 0.6                     | 76.9                                              | 0.7                  | 45.9                                              |
| ACS_16      | 2.3                  | 9.7                                               | 2.0                     | 22.5                                              | 8.4                  | 3.6                                               |
| ACS_19      | 12.3                 | 1.8                                               | 10.7                    | 4.1                                               | 11.8                 | 2.5                                               |
| ACS_27      | 3.2                  | 7.1                                               | 0.7                     | 64.8                                              | 4.9                  | 6.1                                               |

## Supplementary Figures

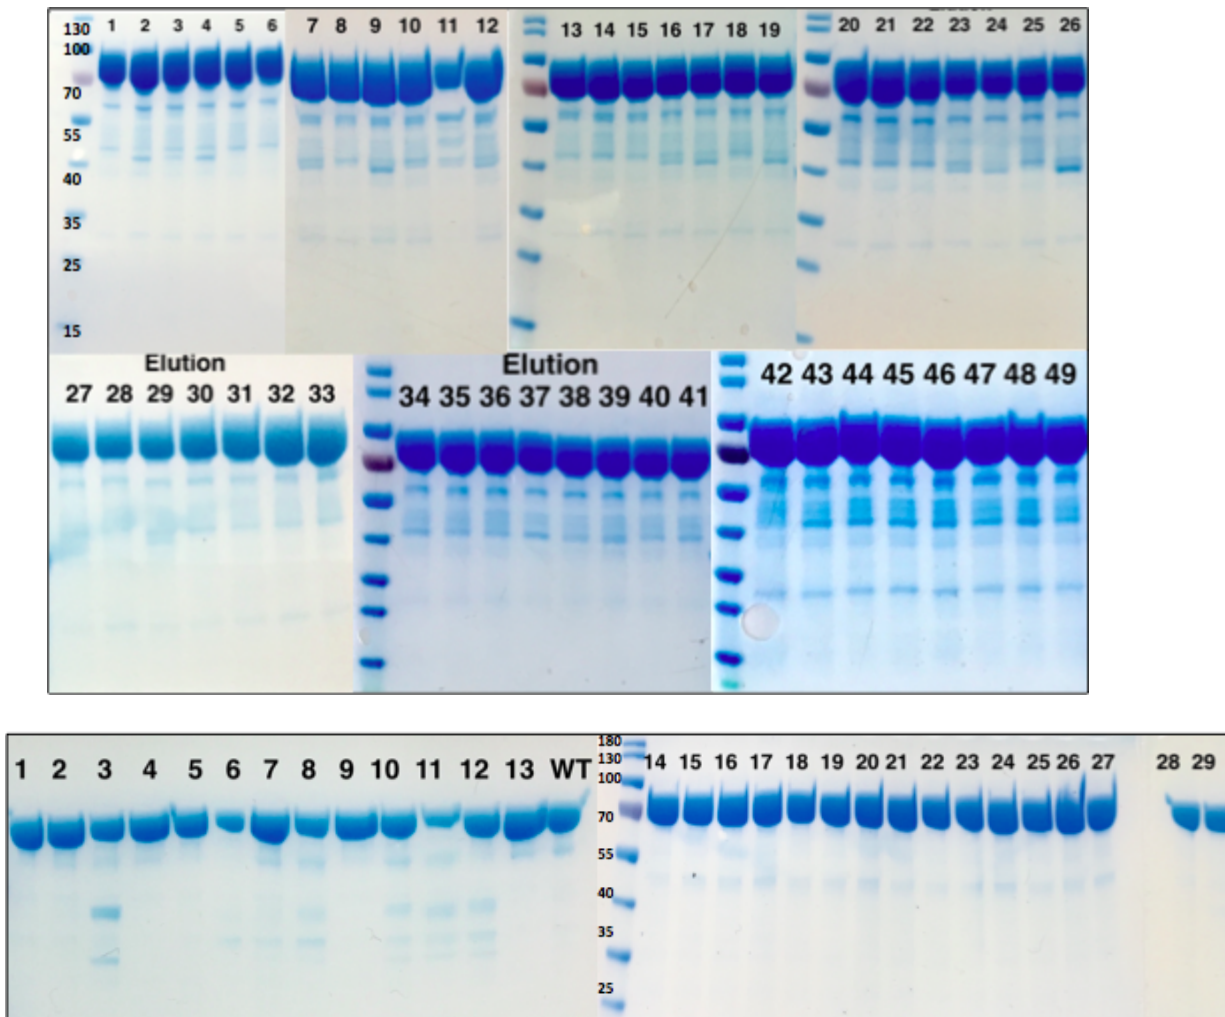

**Figure S1. SDS-PAGE analysis FuncLib designs. Related to Figures 2 and 5.** Top: PTE designs 1-49 after purification with amylose resin. Bottom: ACS designs 1-29 after purification with Ni-NTA resin.

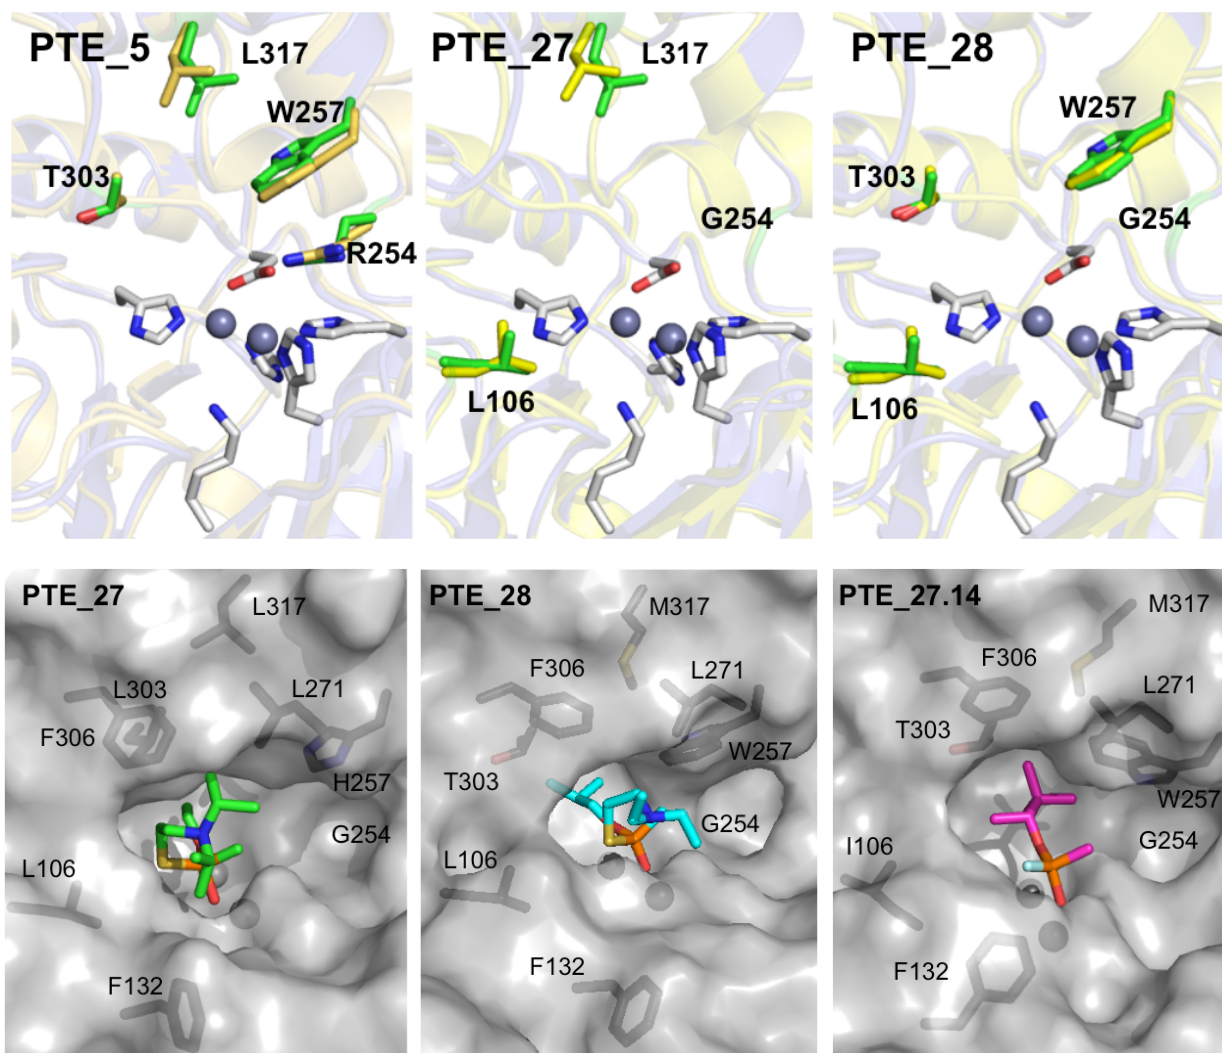

**Figure S2. Top: Overlay of designed PTE crystal structures (yellow) and models (green).**

Metal-chelating residues are shown as gray sticks, and Zn<sup>2+</sup> ions as gray spheres.

**Bottom: Catalytic poses of nerve agents in designed active-site pockets. Related to Figure 4.**

The poses were obtained from docking simulations using the Adaptive-PELE method. Shown are S<sub>p</sub> stereoisomers of VX, RVX, and GD in the active-site pockets of PTE\_27, PTE\_28, and PTE\_27.14, respectively. The three models show high geometric complementarity between the designed pockets and the respective substrates. Designed residues and the substrates are shown as sticks and Zn<sup>2+</sup> ions as gray spheres. The PTE\_27 and PTE\_28 poses were started from their respective X-ray crystallographic structures, and PTE\_27.14 was started from the design model.

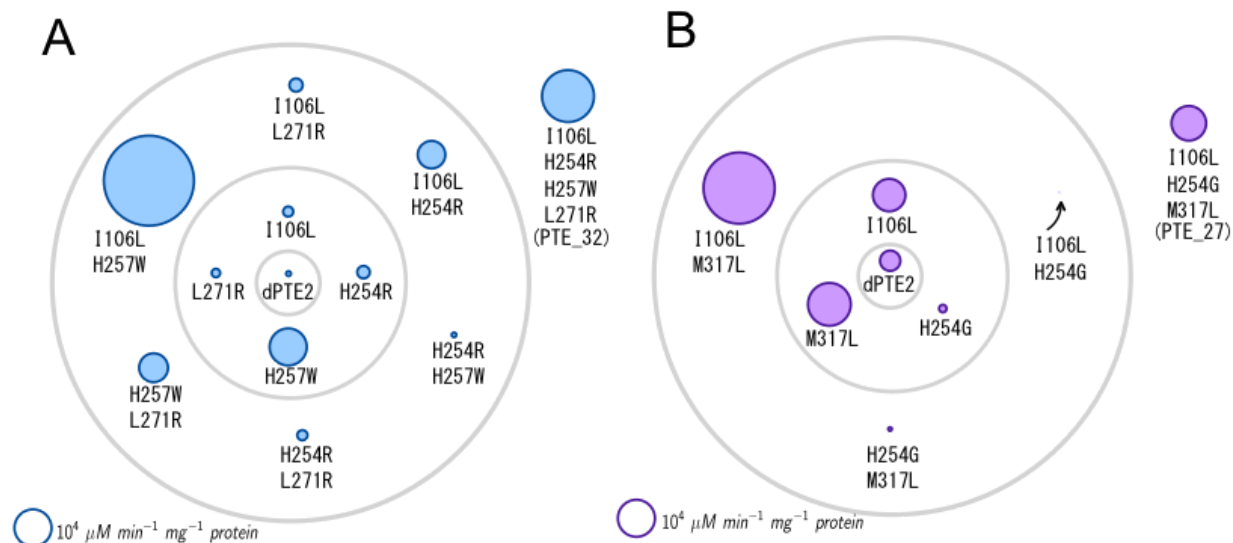

**Figure S3. Epistasis among FuncLib mutations. Related to Figure 3. (A)** PTE\_32 (>100-fold improvement in esterase activity). **(B)** PTE\_27 (65-fold improvement in lactonase activity). Circle sizes correspond to specific activities with 2-NA **(A)** and TBBL **(B)**.

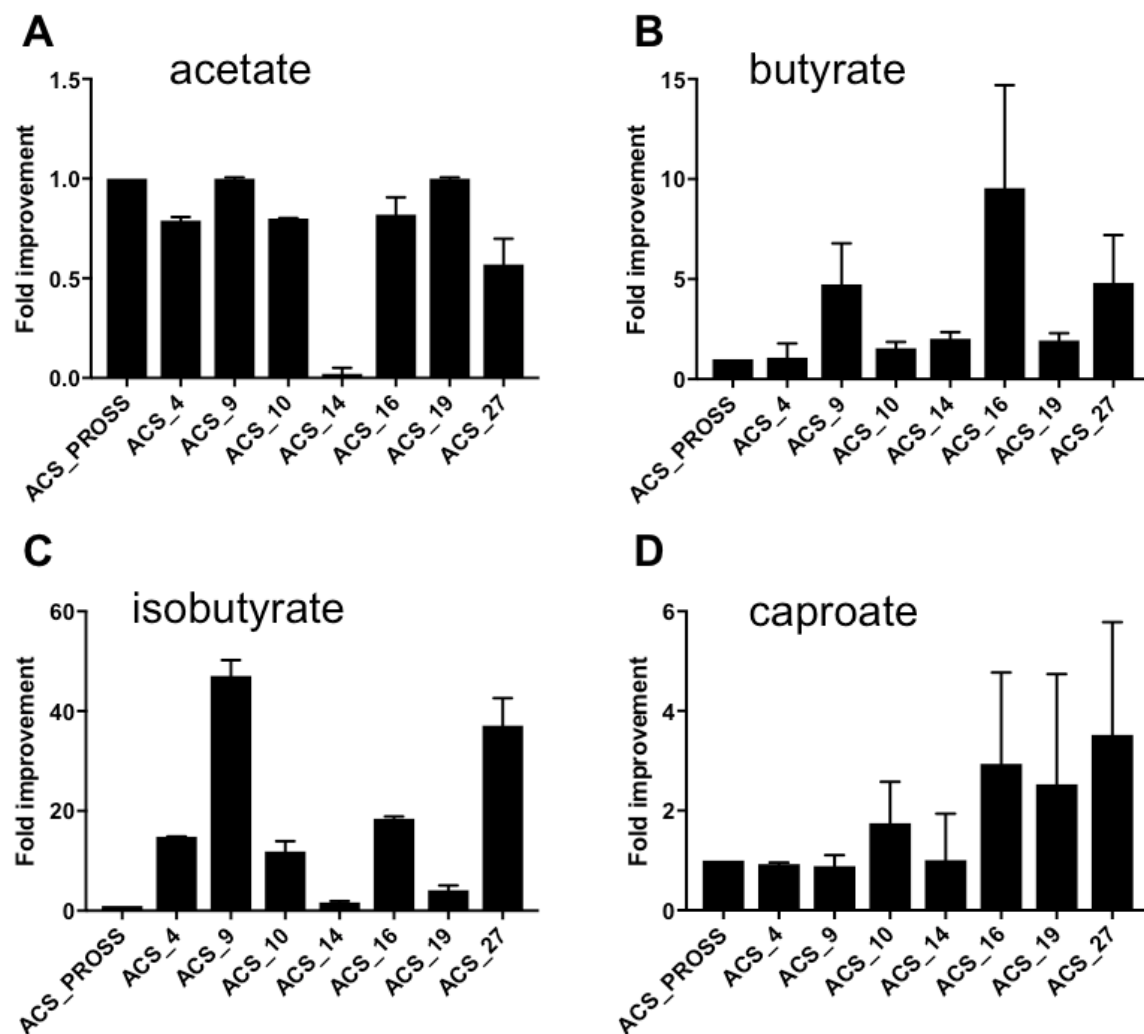

**Figure S4.** Fold improvement in specific activity of the best FuncLib ACS designs relative to ACS\_PROSS with acetate (A), butyrate (B), isobutyrate (C), and caproate (D). Related to Figure 5.

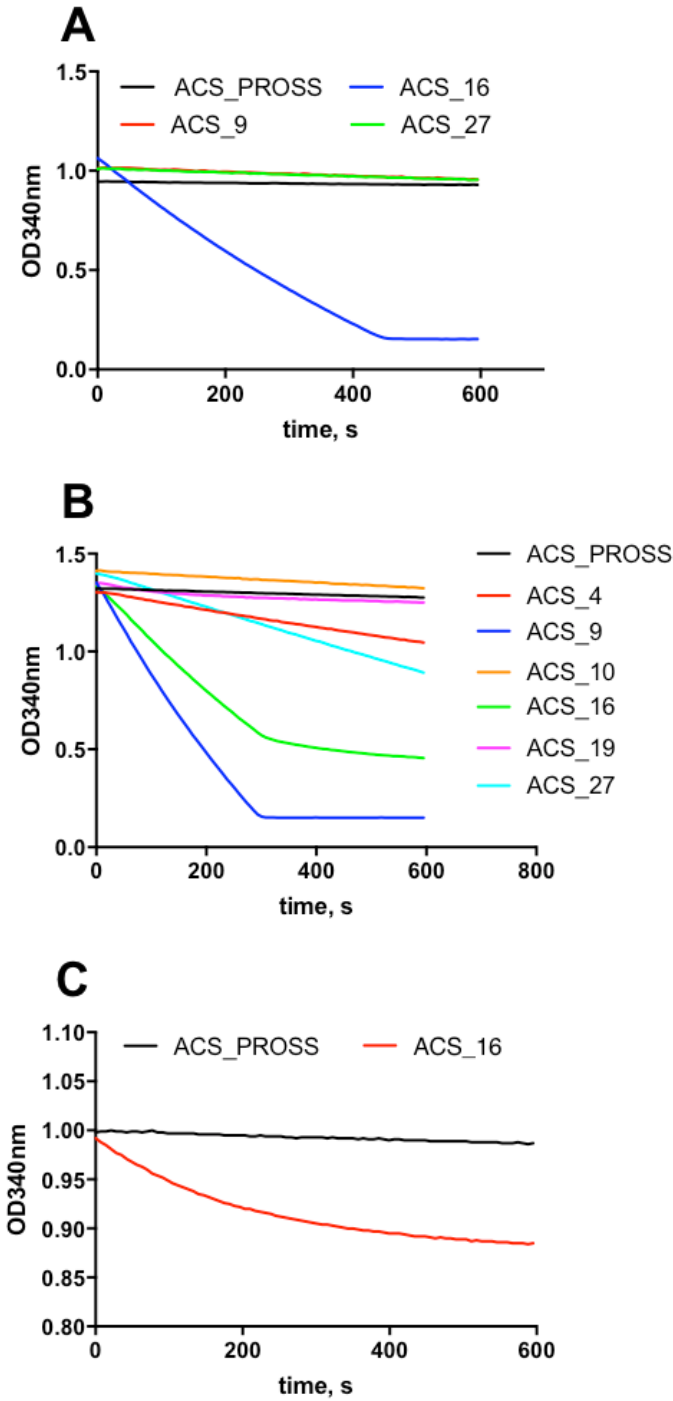

**Figure S5. Kinetic traces of the ACS variants with 1mM butyrate (A), isobutyrate (B), and caproate (C), measured by the coupled assay(Reger et al., 2007). Related to Figure 5. ACS activity is coupled to NADH consumption, and larger decrease of OD at 340nm in FuncLib ACS designs relative to ACS\_PROSS corresponds to higher activity.**
